# Supplementary figures and images for: Cellular and Humoral SARS-CoV-2 Vaccination Responses in 192 Adult Recipients of Allogeneic Hematopoietic Cell Transplantation
Source: MDPI journal article supplement (doi:10.3390/vaccines10111782), 2022-10-23

**A B cells**

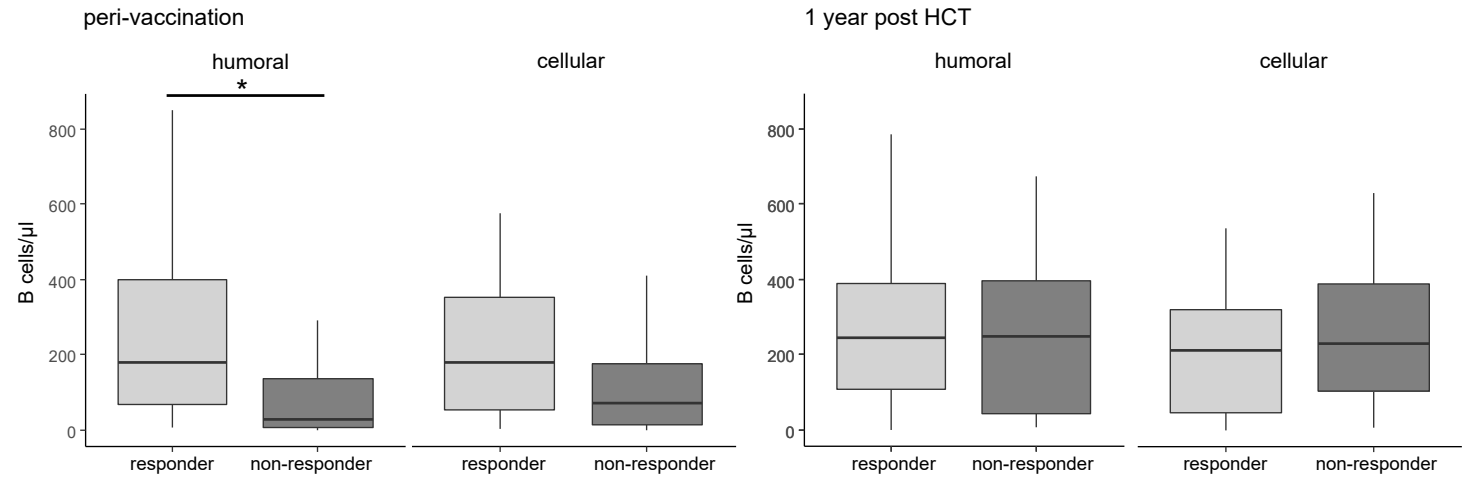

**B CD4<sup>+</sup> T cells**

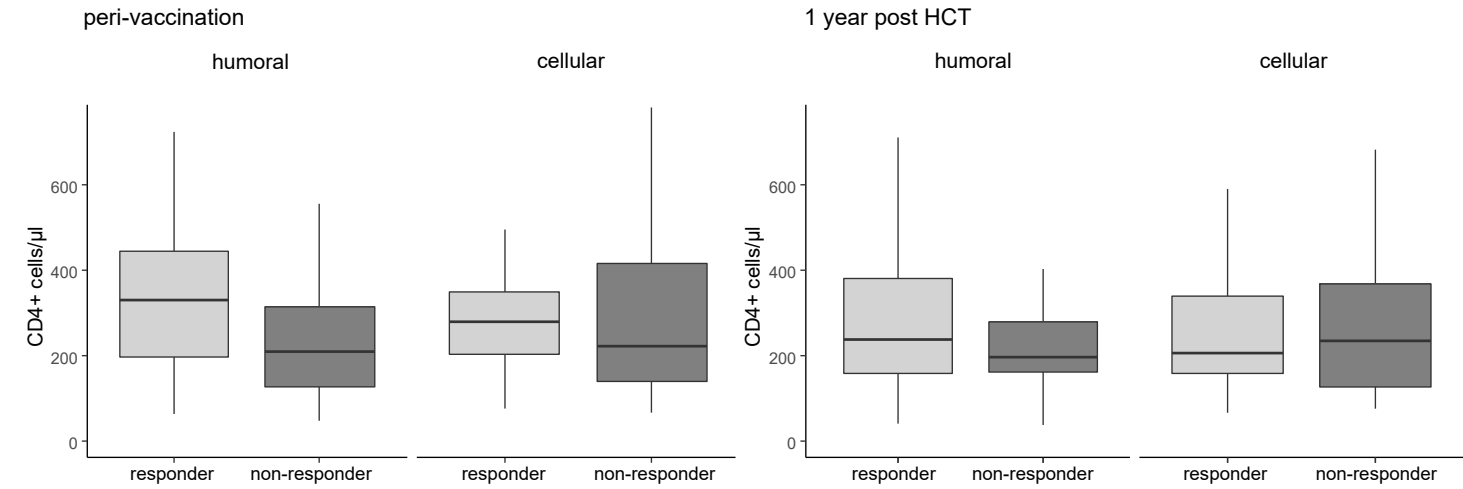

**C CD8<sup>+</sup> T cells**

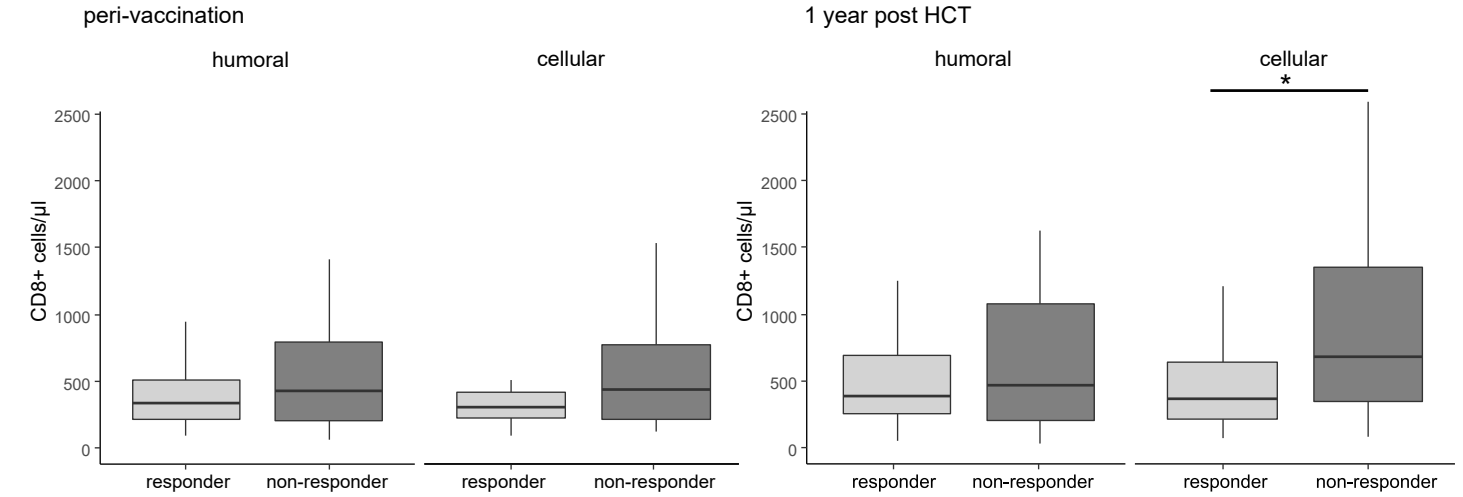

**D NK cells**

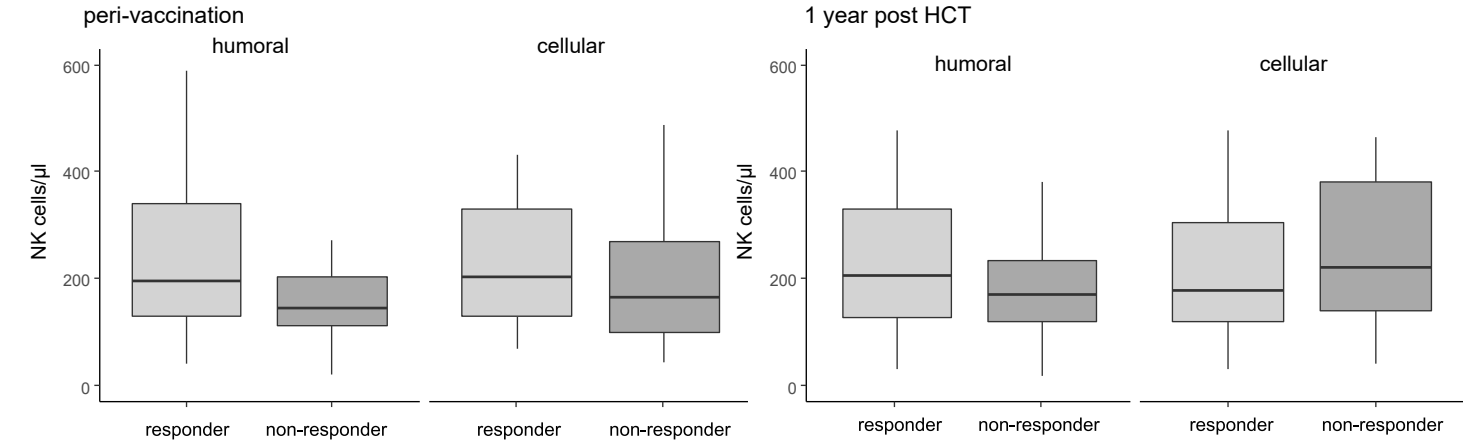

Supplement: s1 [file s1]
